# Supplementary material for: Does the Effectiveness of Control Measures Depend on the Influenza Pandemic Profile?
Source: PubMed Central journal article supplement (PMC2198944; doi:10.1371/journal.pone.0001478), 2008-01-23
Supplement: pone.0001478.s002.pdf [file pone.0001478.s002.pdf]

Table S2: Characteristics of the initial city: ranges of values and the corresponding categories.

|                                         | Category 1 | Category 2  | Category 3  | Category 4   | Category 5    | Category 6    |
|-----------------------------------------|------------|-------------|-------------|--------------|---------------|---------------|
| Population size<br>(x 10 <sup>3</sup> ) | ≤ 2400     | 2401 – 3500 | 3501 – 5000 | 5001 – 9000  | 9001 – 13000  | 13001 – 24000 |
| Mean daily flow                         | ≤ 2000     | 2001 – 5000 | 5001 – 8000 | 8001 – 19000 | 20001 – 30000 | 30001 – 70000 |
| Mean number of<br>connections           | ≤ 19       | 20 – 29     | 30 – 39     | 40 – 49      | > 49          | -             |

For each city, the following variables have been considered: population size, mean daily flow of individuals traveling from this city and mean number of connections between this city and the other cities of our network. In our analyses, these variables have been categorized as presented in the table.
