# Supplementary material for: Does the Effectiveness of Control Measures Depend on the Influenza Pandemic Profile?
Source: PubMed Central journal article supplement (PMC2198944; doi:10.1371/journal.pone.0001478), 2008-01-23
Supplement: pone.0001478.s003.pdf [file pone.0001478.s003.pdf]

Table S3: Input parameters that do not vary over time and their respective values.

| Input parameters related to the pandemic                                                           | Value                                                | References |
|----------------------------------------------------------------------------------------------------|------------------------------------------------------|------------|
| Maximum day of latent period                                                                       | 2 days                                               | [1,2]      |
| Maximum day of infectious period                                                                   | 8 days                                               | [1,2]      |
| Reporting rate of cases to authorities                                                             | 0.6                                                  | [3-5]      |
| Number of cities                                                                                   | 52                                                   |            |
| Seed (i.e. number of individuals of initial city in latent state at the beginning of the pandemic) | $10^{-5}$ of the population size of the initial city | [1]        |
| Temporal shift in transmission between Northern and Southern hemispheres                           | 6 months                                             | [2,4,6,7]  |
| Input parameters related to interventions                                                          |                                                      |            |
| Duration of prophylaxis for each individual                                                        | 10 days                                              |            |
| Mean duration of infectious period under antiviral therapy                                         | $(T_I^* - 1)$ days                                   | [3,4,8]    |
| Time lag between the first case in the initial city and the start of air traffic between cities    | 5 days                                               |            |

\*  $T_I$ : Mean duration of the infectious period in the absence of any intervention.

## References

1. Rvachev L, Longini IM, Jr. (1985) A mathematical model for the global spread of influenza. *Math Biosci* 75:3-22.
2. Grais RF, Ellis JH, Kress A, Glass GE (2004) Modeling the spread of annual influenza epidemics in the U.S.: the potential role of air travel. *Health Care Manag Sci* 7:127-134.
3. Germann TC, Kadau K, Longini IM Jr, Macken CA (2006) Mitigation strategies for pandemic influenza in the United States. *Proc Natl Acad Sci USA* 103:5935-5940.
4. Ferguson NM, Mallett S, Jackson H, Roberts N, Ward P (2003) A population-dynamic model for evaluating the potential spread of drug-resistant influenza virus infections during community-based use of antivirals. *J Antimicrob Chemother* 51:977-990.
5. Stilianakis NI, Perelson AS, Hayden FG (1998) Emergence of drug resistance during an influenza epidemic: insights from a mathematical model. *J Infect Dis* 177:863-873.
6. Cox NJ, Subbarao K (2000) Global epidemiology of influenza: past and present. *Annu Rev Med* 51:407-421.
7. Dushoff J, Plotkin JB, Levin SA, Earn DJ (2004) Dynamical resonance can account for seasonality of influenza epidemics. *Proc Natl Acad Sci USA* 101:16915-19916.
8. Longini IM, Jr., Halloran ME, Nizam A, Yang Y (2004) Containing pandemic influenza with antiviral agents. *Am J Epidemiol* 159:623-633.
